# Supplementary material
Source: publisher figshare collection journal article supplement (https://acs.figshare.com/ndownloader/files/8758144)
Supplement: Supplementary file 1 [file 8758144]

5,O=C(NC(SCC(C=C1)=CC=C1C)=N2)C3=C2CCC3
(S)-10a,O=C(NC(SCC(C=C1)=CC=C1C2=CC=C(S(=O)(N[C@@H](C(C)C)C(O)=O)=O)C=C2)=N3)C4=C3CCC4
(R)-10a,O=C(NC(SCC(C=C1)=CC=C1C2=CC=C(S(=O)(N[C@H](C(C)C)C(O)=O)=O)C=C2)=N3)C4=C3CCC4
10b,O=C(NC(SCC(C=C1)=CC=C1C2=CC=C(S(=O)(NCC(O)=O)=O)C=C2)=N3)C4=C3CCC4
10c,O=C(NC(SCC(C=C1)=CC=C1C2=CC=C(S(=O)(NCCO)=O)C=C2)=N3)C4=C3CCC4
10d,O=C(NC(SCC(C=C1)=CC=C1C2=CC=C(S(=O)(NCCN)=O)C=C2)=N3)C4=C3CCC4
10e,O=C(NC(SCC(C=C1)=CC=C1C2=CC=C(S(=O)(N[C@@H]3[C@H](N)CCCC3)=O)C=C2)=N4)C5=C4CCC5
10f,O=C(NC(SCC(C=C1)=CC=C1C2=CC=C(S(=O)(N[C@@H]3[C@@H](N)CCCC3)=O)C=C2)=N4)C5=C4CCC5
(S)-17a,O=C(NC(SCC(C=C1)=CC=C1C2=CC=C(C(N[C@@H](C(C)C)C(NC)=O)=O)O2)=N3)C4=C3CCC4
(R)-17a,O=C(NC(SCC(C=C1)=CC=C1C2=CC=C(C(N[C@H](C(C)C)C(NC)=O)=O)O2)=N3)C4=C3CCC4
(S)-17b,O=C(NC(SCC(C=C1)=C(F)C=C1C2=CC=C(C(N[C@@H](C(C)C)C(NC)=O)=O)O2)=N3)C4=C3CCC4
(R)-17b,O=C(NC(SCC(C=C1)=C(F)C=C1C2=CC=C(C(N[C@H](C(C)C)C(NC)=O)=O)O2)=N3)C4=C3CCC4
(S)-17c,O=C(NC(SCC(C=C1)=C(F)C=C1C2=CC=C(C(N[C@@H](C3CCCCC3)C(NC)=O)=O)O2)=N4)C5=C4CCC5
(R)-17c,O=C(NC(SCC(C=C1)=C(F)C=C1C2=CC=C(C(N[C@H](C3CCCCC3)C(NC)=O)=O)O2)=N4)C5=C4CCC5
